# Supplementary material for: Multifaceted roles of GRAS transcription factors in growth and stress responses in plants
Source: PubMed Central journal article supplement — iScience. 2022 Aug 28;25(9):105026. doi: 10.1016/j.isci.2022.105026 (PMC9474926; doi:10.1016/j.isci.2022.105026), 2022-08-28
Supplement: mmc1.pdf [file mmc1.pdf]

**iScience, Volume 25**

**Supplemental information**

**Multifaceted roles of GRAS transcription**

**factors in growth and stress**

**responses in plants**

**Vandana Jaiswal, Mrinalini Kakkar, Priya Kumari, Gaurav Zinta, Vijay Gahlaut, and Sanjay Kumar**

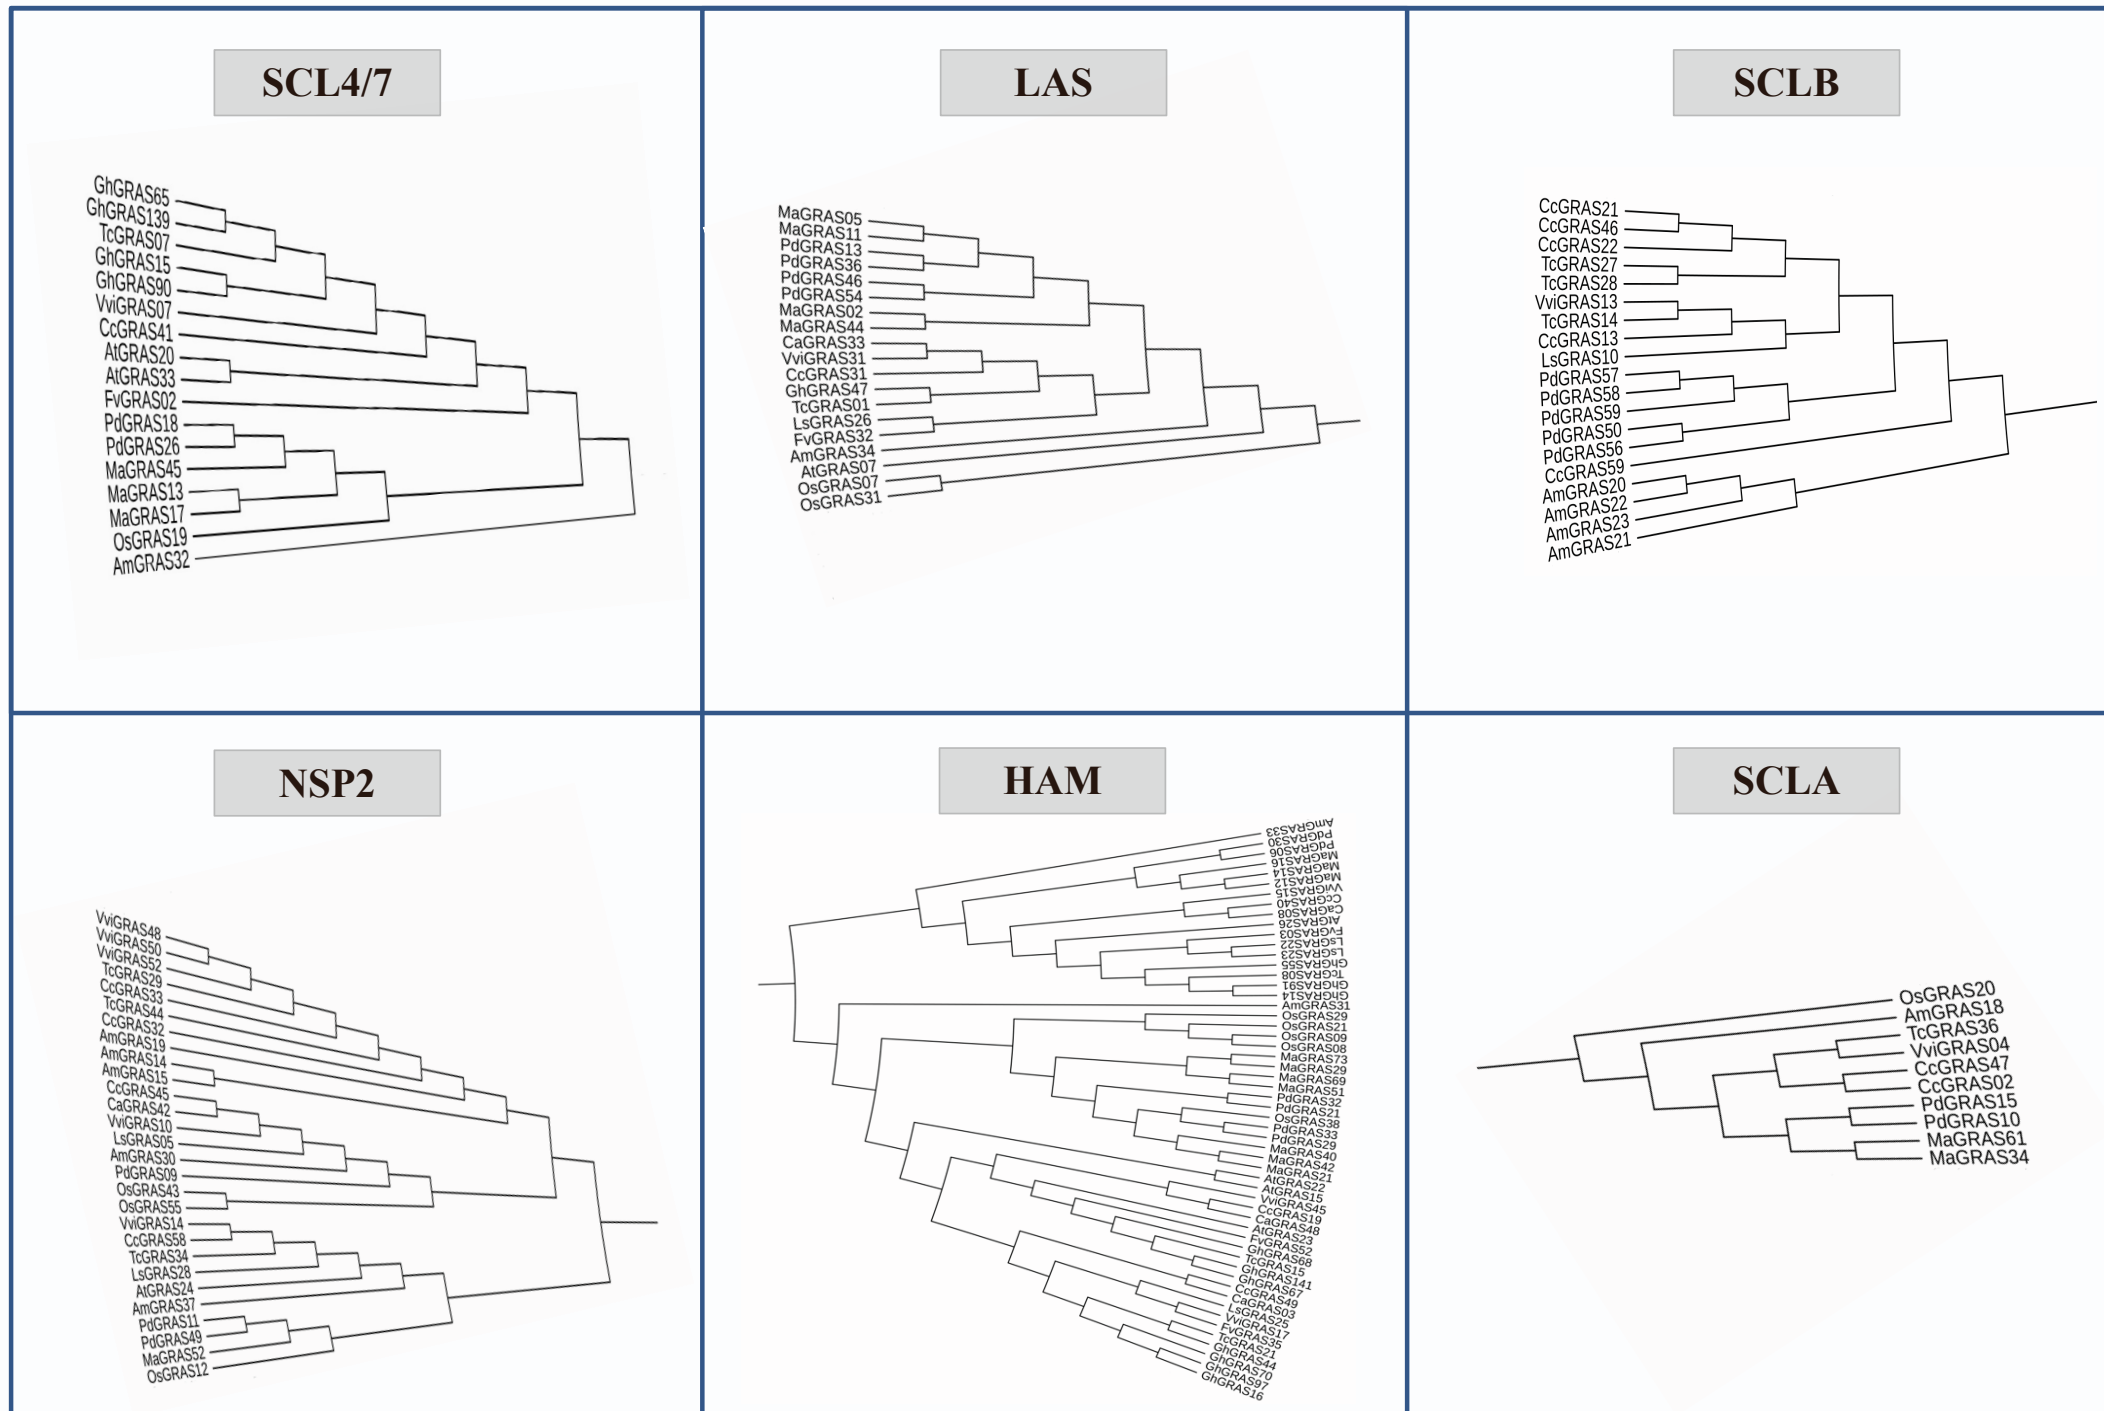

**Figure S1. Details zoomed view of individual clade belongs to six different GRAS sub-families (SCL4/7, LAS, SCLB, NSP2, HAM and SCLA) as represented in Figure 2, Related to Figure 2.**

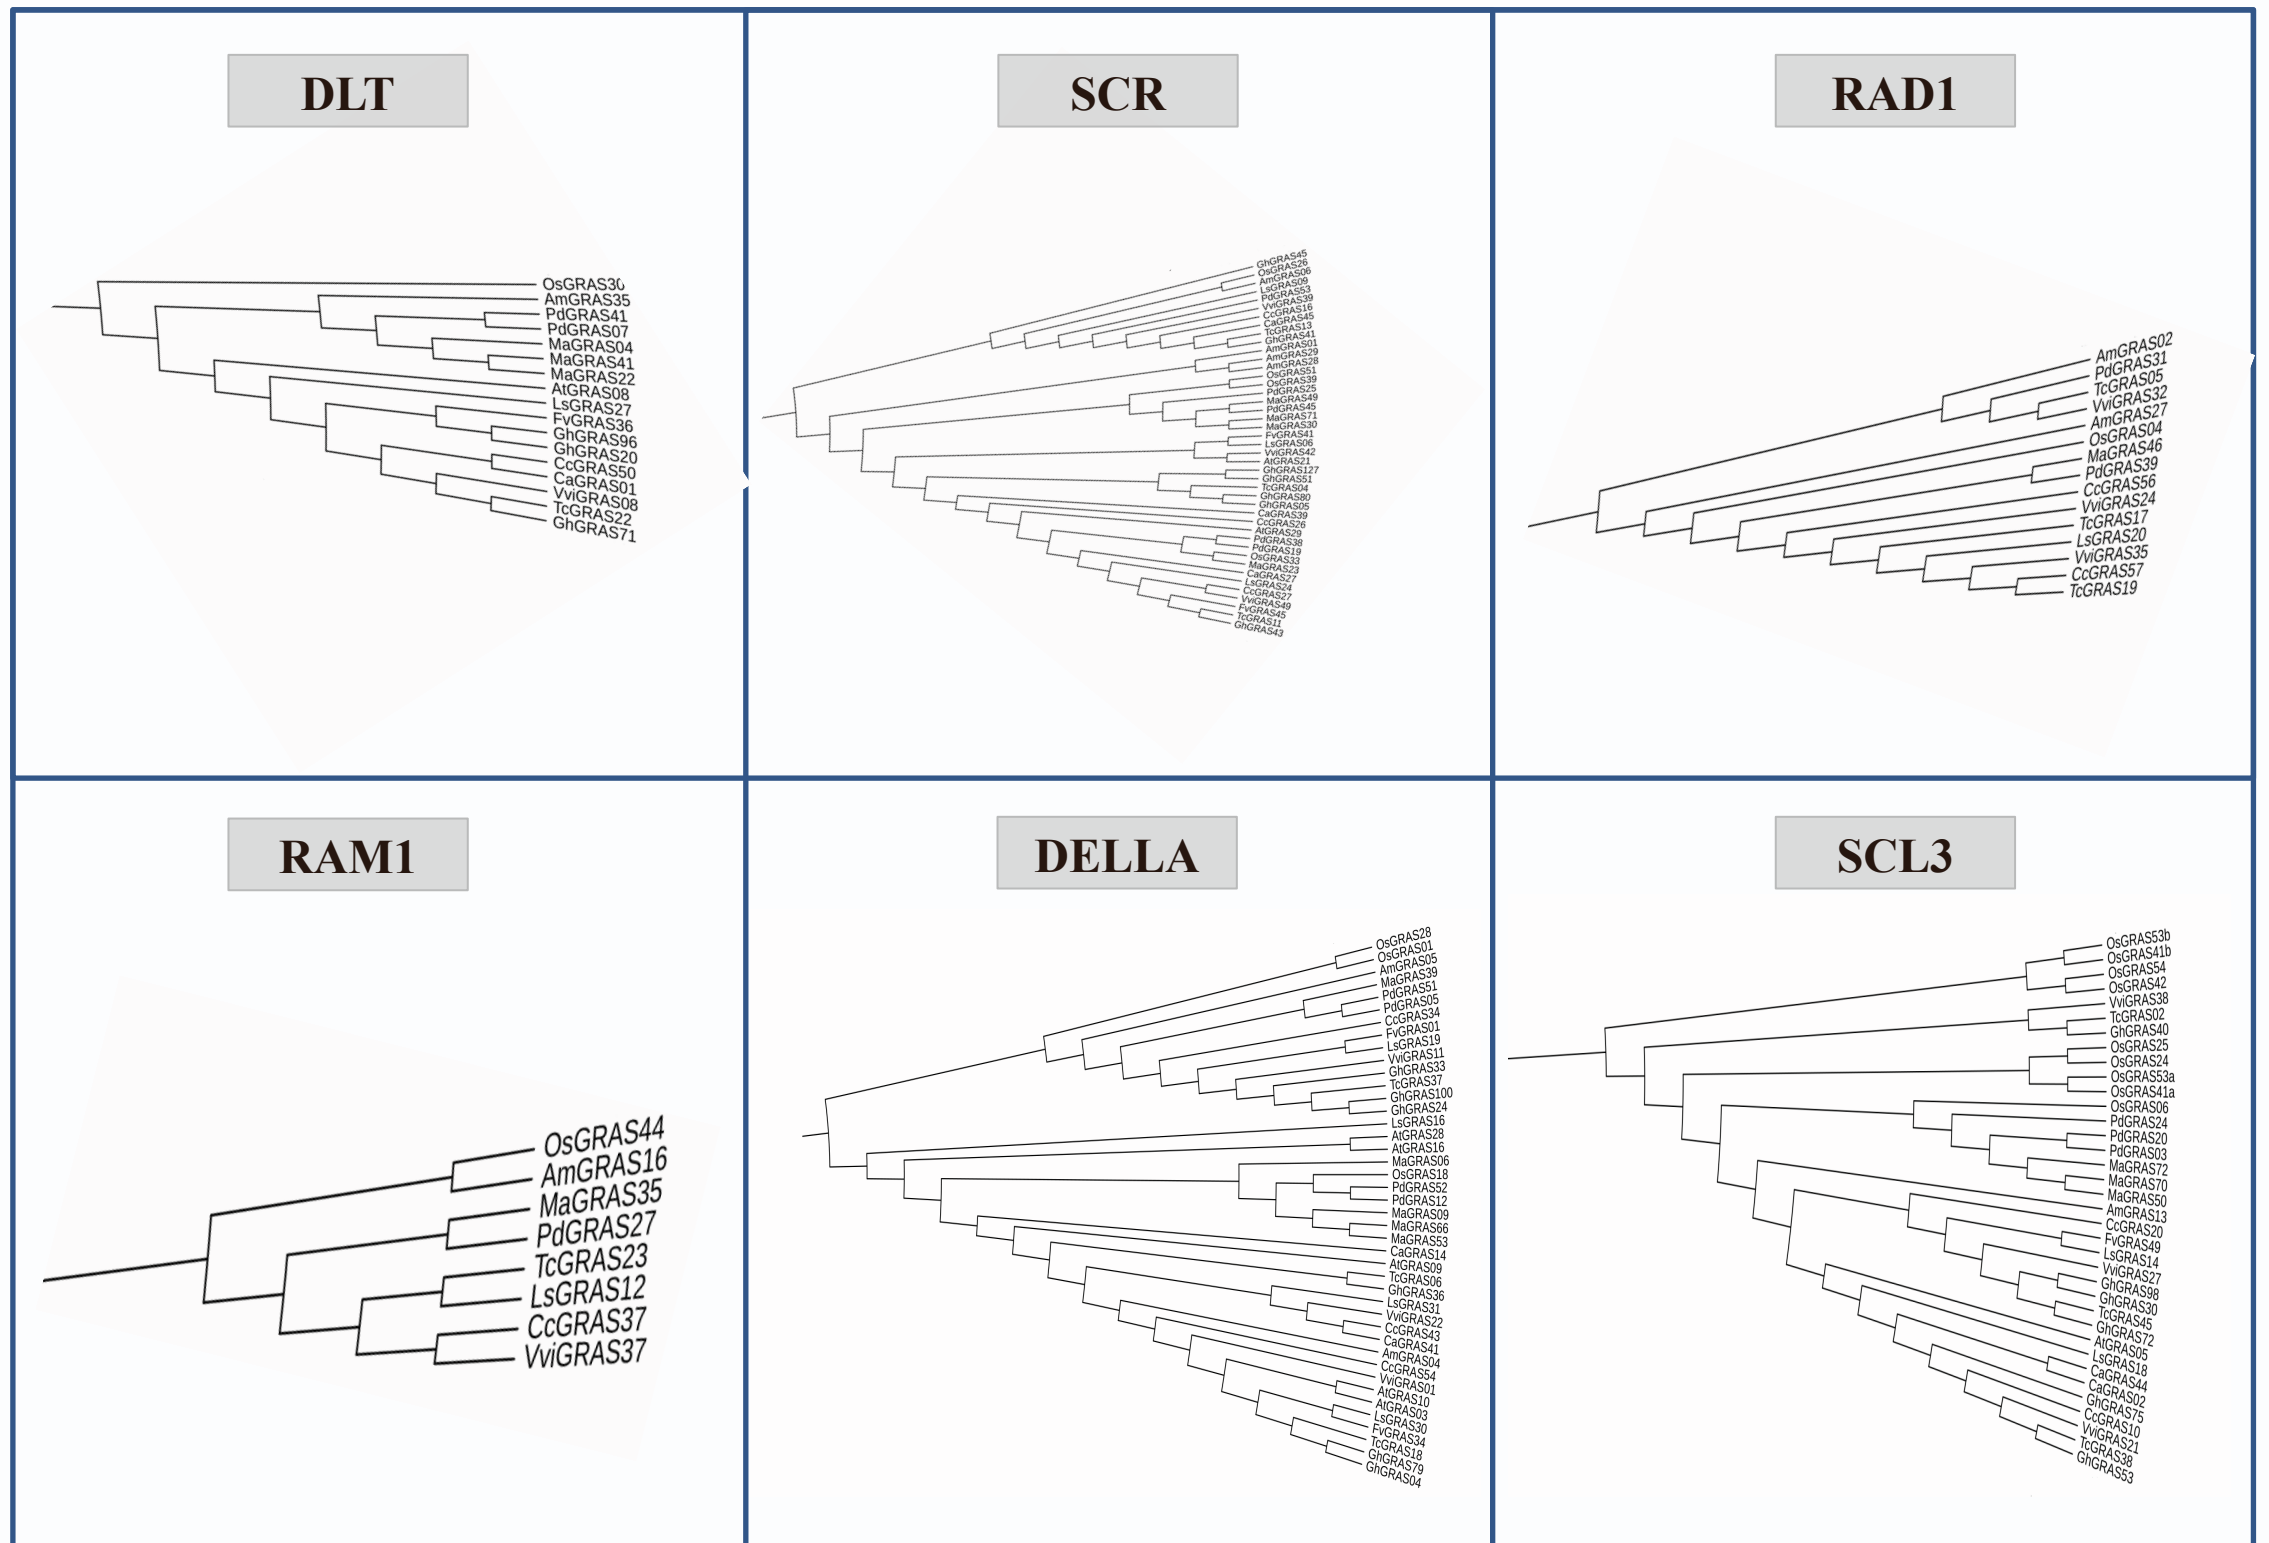

Figure S2. Details zoomed view of individual clade belongs to six different GRAS sub-families (DLT, SCR, RAD1, RAM1, DELLA and SCL3) as represented in Figure 2, Related to Figure 2.
